# Supplementary material for: Patterning in Patient Referral to and Uptake of a National Exercise Referral Scheme (NERS) in Wales from 2008 to 2017: A Data Linkage Study
Source: PubMed Central journal article supplement (PMC7313463; doi:10.3390/ijerph17113942), 2020-06-02
Supplement: ijerph-17-03942-s001.pdf [file ijerph-17-03942-s001.pdf]

Supplementary file 1

Table S1: Records of NERS referrals with no data linkage (N = 8666 \*)

|                            | Overall | N    | %     |
|----------------------------|---------|------|-------|
| <b>Reason for referral</b> | 8,652   |      |       |
| CHD only                   |         | 1796 | 20.76 |
| Mental health only         |         | 1252 | 14.47 |
| Musculoskeletal            |         | 3741 | 43.24 |
| Level 4                    |         | 1031 | 11.92 |
| CHD and mental health      |         | 832  | 9.62  |
| <b>Referrer type</b>       | 8666    |      |       |
| GP                         |         | 5827 | 67.24 |
| Physiotherapist            |         | 1947 | 22.47 |
| Other                      |         | 892  | 10.29 |
| <b>Year of referral</b>    | 8664    |      |       |
| 2009                       |         | 5    | 0.06  |
| 2010                       |         | 123  | 1.42  |
| 2011                       |         | 2131 | 24.60 |
| 2012                       |         | 2606 | 30.08 |
| 2013                       |         | 1149 | 13.26 |
| 2014                       |         | 798  | 9.21  |
| 2015                       |         | 606  | 6.99  |
| 2016                       |         | 669  | 7.72  |
| 2017                       |         | 577  | 6.66  |
| <b>Trial area</b>          | 8666    |      |       |
| Yes                        |         | 5211 | 60.13 |
| No                         |         | 3455 | 39.87 |

\*2 duplicate records have been removed
